# Supplementary material for: Simple and accurate quantitative analysis of cefiderocol and ceftobiprole in human plasma using liquid chromatography-isotope dilution tandem mass spectrometry: interest for their therapeutic drug monitoring and pharmacokinetic studies
Source: publisher site journal article supplement (doi:10.1515/cclm-2021-0423), 2021-07-09
Supplement: Supplementary file 1 [file j_cclm-2021-0423_suppl.docx]

**A.** [2H12]-cefiderocol

Precursor ion

Product ion

**B.** [2H4]-ceftobiprole

Precursor ion

Product ion

Supplementary Figure 1. Mass spectrum of (A) [2H12]-cefiderocol and (B) [2H4]-ceftobiprole
